# Supplementary material for: Selective deuteration as a tool for resolving autoxidation mechanisms in α-pinene ozonolysis
Source: Copernicus journal article supplement (doi:10.5194/egusphere-2022-1131), 2022-10-24

# Supplementary information for "Selective deuteration as a tool for resolving autoxidation mechanisms in $\alpha$ -pinene ozonolysis"

Melissa Meder<sup>1</sup>, Otso Peräkylä<sup>1</sup>, Johnathan G. Varelas<sup>2</sup>, Jenny Luo<sup>2</sup>, Runlong Cai<sup>1</sup>, Yanjun Zhang<sup>1</sup>, Theo Kurtén<sup>1,3</sup>, Matthieu Riva<sup>4</sup>, Matti P. Rissanen<sup>5,3</sup>, Franz M. Geiger<sup>2</sup>, Regan J. Thomson<sup>2</sup>, and Mikael Ehn<sup>1</sup>

<sup>1</sup>Institute for Atmospheric and Earth System Research (INAR/physics), University of Helsinki, Helsinki, Finland

<sup>2</sup>Department of Chemistry, Northwestern University, Illinois, USA

<sup>3</sup>Department of Chemistry, University of Helsinki, Helsinki, Finland

<sup>4</sup>Univ Lyon, Université Claude Bernard Lyon 1, CNRS, IRCELYON, Villeurbanne, France

<sup>5</sup>Aerosol Physics laboratory, Tampere University, Tampere, Finland

**Correspondence:** Melissa Meder (Melissa.Meder@helsinki.fi) and Mikael Ehn (Mikael.Ehn@helsinki.fi)

The contents of this supplementary information describe the experimental methods used when synthesising the <sup>3</sup>D<sub>1</sub> selectively deuterated  $\alpha$ -pinene sample.

## 1. General Experimental

All experiments were conducted under a nitrogen atmosphere in flame-dried glassware. All reagents were used as purchased. Reaction solvents were purchased as anhydrous or purified by either a solvent purification column or distillation. Starting materials and reagents were purchased from Sigma-Aldrich and used without further purification unless otherwise noted. Diisopropylamine was distilled over CaH<sub>2</sub> prior to use. Purifications of products were performed by flash column chromatography using silica gel (230 – 400 mesh) as a stationary phase. Analytical thin-layer chromatography technique was performed on silica gel pre-coated glass-backed plates, and the reactions were examined by staining with potassium permanganate stain or *p*-anisaldehyde stain. A Bruker Avance III 500 MHz instrument was used to record <sup>1</sup>H and <sup>13</sup>C NMR spectra of all compounds. NMR data are reported as brs = broad singlet, s = singlet, d = doublet, t = triplet, q = quartet, and m = multiplet. Signals are detailed in ppm and coupling constants in Hz. High-resolution mass spectra were recorded with a time of flight (TOF) mass analyzer Bruker Impact-II Mass Spectrometer. A Bruker Tensor 37 FTIR spectrometer was used to obtain infrared spectra of compounds and data were reported in cm<sup>-1</sup>.

## 2. Experimental Procedures for the Synthesis of $\alpha$ -Pinene-3-*d*<sub>1</sub> (<sup>3</sup>D<sub>1</sub> $\alpha$ -pinene)

### Scheme S1 Synthesis route to $\alpha$ -Pinene-3-*d*<sub>1</sub> (<sup>3</sup>D<sub>1</sub> $\alpha$ -pinene)

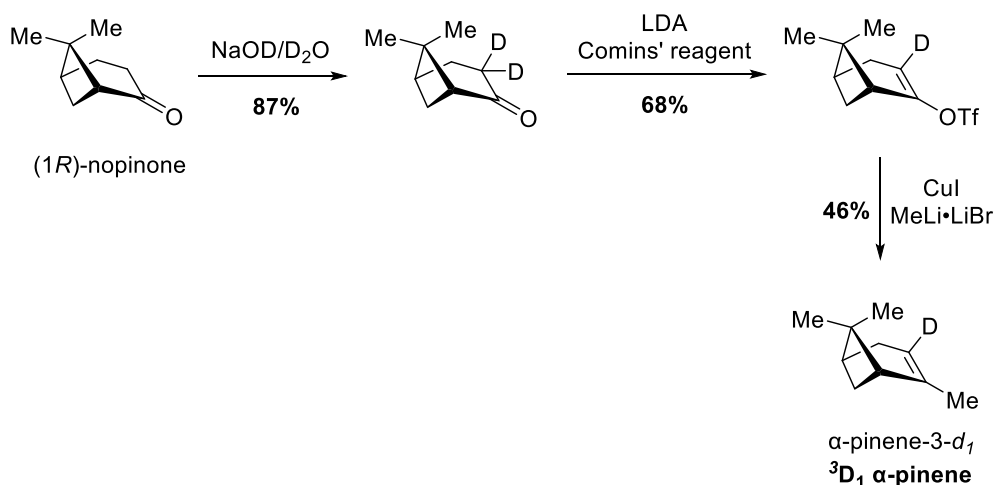

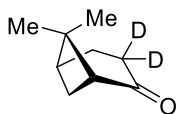

**(1R)-6,6-dimethylbicyclo[3.1.1]heptan-2-one-3,3-*d*<sub>2</sub>**: To a solution of (1R)-nopinone (2.10 g, 15 mmol, 1 equiv) in 40 mL DMSO-*d*<sub>6</sub> was added 7 mL 40 wt% NaOD in D<sub>2</sub>O. Reaction was heated to 90 °C for 3 hours, then cooled to room temperature and diluted with D<sub>2</sub>O (40 mL) and Et<sub>2</sub>O (40 mL). The organic phase was collected and the aqueous layer extracted with Et<sub>2</sub>O (3 x 40 mL). Combined organics were dried with MgSO<sub>4</sub>, filtered, and concentrated under reduced pressure. Flash column chromatography on silica gel using 15% - 20% Et<sub>2</sub>O in pentane as the eluent afforded the title compound (1.83 g, 87%) as a light yellow oil. <sup>1</sup>H NMR (500 MHz, CDCl<sub>3</sub>) δ 2.58 – 2.47 (m, 2H), 2.26 – 2.19 (m, 1H), 2.07 – 1.98 (m, 1H), 1.96 – 1.89 (m, 1H), 1.57 (d, J = 10.3 Hz, 1H), 1.32 (s, 3H), 0.84 (s, 3H). <sup>13</sup>C NMR (500 MHz, CDCl<sub>3</sub>) δ 215.07, 57.96, 41.22, 40.37, 32.01 (m, 1C), 25.89, 25.25, 22.10, 21.20. FT-IR (neat): 2930, 2874, 1715, 1459. 1370, 1268, 1159, 1053 cm<sup>-1</sup>. HRMS (APCI): Exact mass calcd for C<sub>9</sub>H<sub>12</sub>D<sub>2</sub>O [M+H]<sup>+</sup>, 141.1243. Found 141.1242.

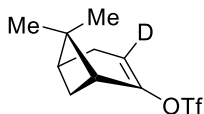

**(1R)-6,6-dimethylbicyclo[3.1.1]hept-2-en-2-yl-3-*d* trifluoromethanesulfonate**: To a solution of diisopropylamine (0.9 mL, 6.42 mmol, 1.5 equiv) in THF (12 mL) at -78 °C was added *n*-butyllithium (2.5 mL, 6.42 mmol, 2.5 M in hexanes, 1 equiv). After 15 minutes, (1R)-6,6-dimethylbicyclo[3.1.1]heptan-2-one-3,3-*d*<sub>2</sub> (**S1**) (600 mg, 4.28 mmol, 1 equiv) in THF (10 mL) was added dropwise into the solution of LDA and stirred for 40 minutes. At this time, a solution of Comins' reagent (3.36 g, 8.56 mmol, 2 equiv) in THF (8 mL) was added over a period of 15 minutes. The resulting mixture was warmed to 0 °C and stirred for 2 hours. Reaction was diluted with D<sub>2</sub>O (50 mL) and Et<sub>2</sub>O (25 mL) and transferred to a separatory funnel. The organic phase was collected and the aqueous layer extracted with Et<sub>2</sub>O (3 x 30 mL). The combined organics were dried with MgSO<sub>4</sub>. Concentration under reduced pressure and flash column chromatography on silica gel in 0% - 3% Et<sub>2</sub>O in pentane as the eluent afforded the title compound (790 mg, 68% yield) as a clear oil. <sup>1</sup>H NMR (500 MHz, CDCl<sub>3</sub>): 2.56 (dt, J = 9.1, 5.7 Hz, 1H), 2.41 – 2.25 (m, 3H), 2.17 – 2.12 (m, 1H), 1.38 (d, J = 9.2 Hz, 1H), 1.35 (s, 3H), 0.93 (s, 3H). <sup>13</sup>C NMR (500 MHz, CDCl<sub>3</sub>) δ 154.98, 118.54 (q, 1C, J = 321 Hz), 111.23 (m, 1C), 46.27, 40.11, 39.72, 31.71, 28.07, 25.48, 25.47, 20.81, 20.80. FT-IR (neat): 2940, 2841, 1653, 1418, 1202, 1138, 1058. HRMS (APCI): APCI, Exact mass calcd for C<sub>10</sub>H<sub>12</sub>F<sub>3</sub>O<sub>3</sub>S [M-D]<sup>-</sup>, 269.0645. Found 269.0640.

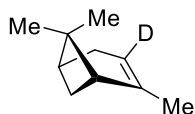

**(1S)-2,6,6-trimethylbicyclo[3.1.1]hept-2-ene-3-*d* (<sup>3</sup>D<sub>1</sub>-α-pinene):** Methyllithium lithium bromide complex (3.9 mL, 5.86 mmol, 1.5 M in Et<sub>2</sub>O, 3.5 equiv) was added to a slurry of CuI (0.80g, 4.18 mmol, 2.5 equiv) in THF (8 mL) at -5 °C. After stirring for 15 minutes, a room temperature solution of (1*R*)-6,6-dimethylbicyclo[3.1.1]hept-2-en-2-yl-3-*d* trifluoromethanesulfonate (0.45 g, 1.67 mmol, 1 equiv) in THF (7 mL) was added dropwise. Reaction mixture turned dark red. Reaction warmed to room temperature overnight. Reaction mixture was recooled to 0 °C, then quenched with dropwise addition of H<sub>2</sub>O until bubbling subsided. Reaction mixture was diluted with H<sub>2</sub>O (50 mL) and extracted with pentane (3 x 30 mL). Combined organics were dried with Na<sub>2</sub>SO<sub>4</sub> and filtered. Concentration under reduced pressure and flash column chromatography on silica gel in 100% pentane as the eluent afforded the title compound (105 mg, 46% yield) as a clear oil. <sup>1</sup>H NMR (500 MHz, CDCl<sub>3</sub>) δ 2.33 (dt, *J* = 8.5, 5.6 Hz, 1H), 2.28 – 2.11 (m, 2H), 2.11 – 2.03 (m, 1H), 1.93 (t, *J* = 5.6 Hz, 1H), 1.66 (t, *J* = 2.2 Hz, 3H), 1.27 (s, 3H), 1.15 (d, *J* = 8.5 Hz, 1H), 0.84 (s, 3H). <sup>13</sup>C NMR (500 MHz, CDCl<sub>3</sub>) 144.41, 115.68 (m, 1C), 47.01, 47.00, 40.71, 37.97, 31.47, 31.14, 26.37, 22.93, 20.79. FT-IR (neat): 2986, 2917, 2834, 1469, 1436, 1380, 1365, 1207, 1099, 1061 cm<sup>-1</sup>. HRMS (APCI): Exact mass calcd for C<sub>10</sub>H<sub>15</sub>D [M+H]<sup>+</sup>, 138.1388. Found 138.1388.

<sup>1</sup>H NMR (500 MHz, CDCl<sub>3</sub>) spectrum of (1*R*)-6,6-dimethylbicyclo[3.1.1]heptan-2-one-3,3-*d*<sub>2</sub>.

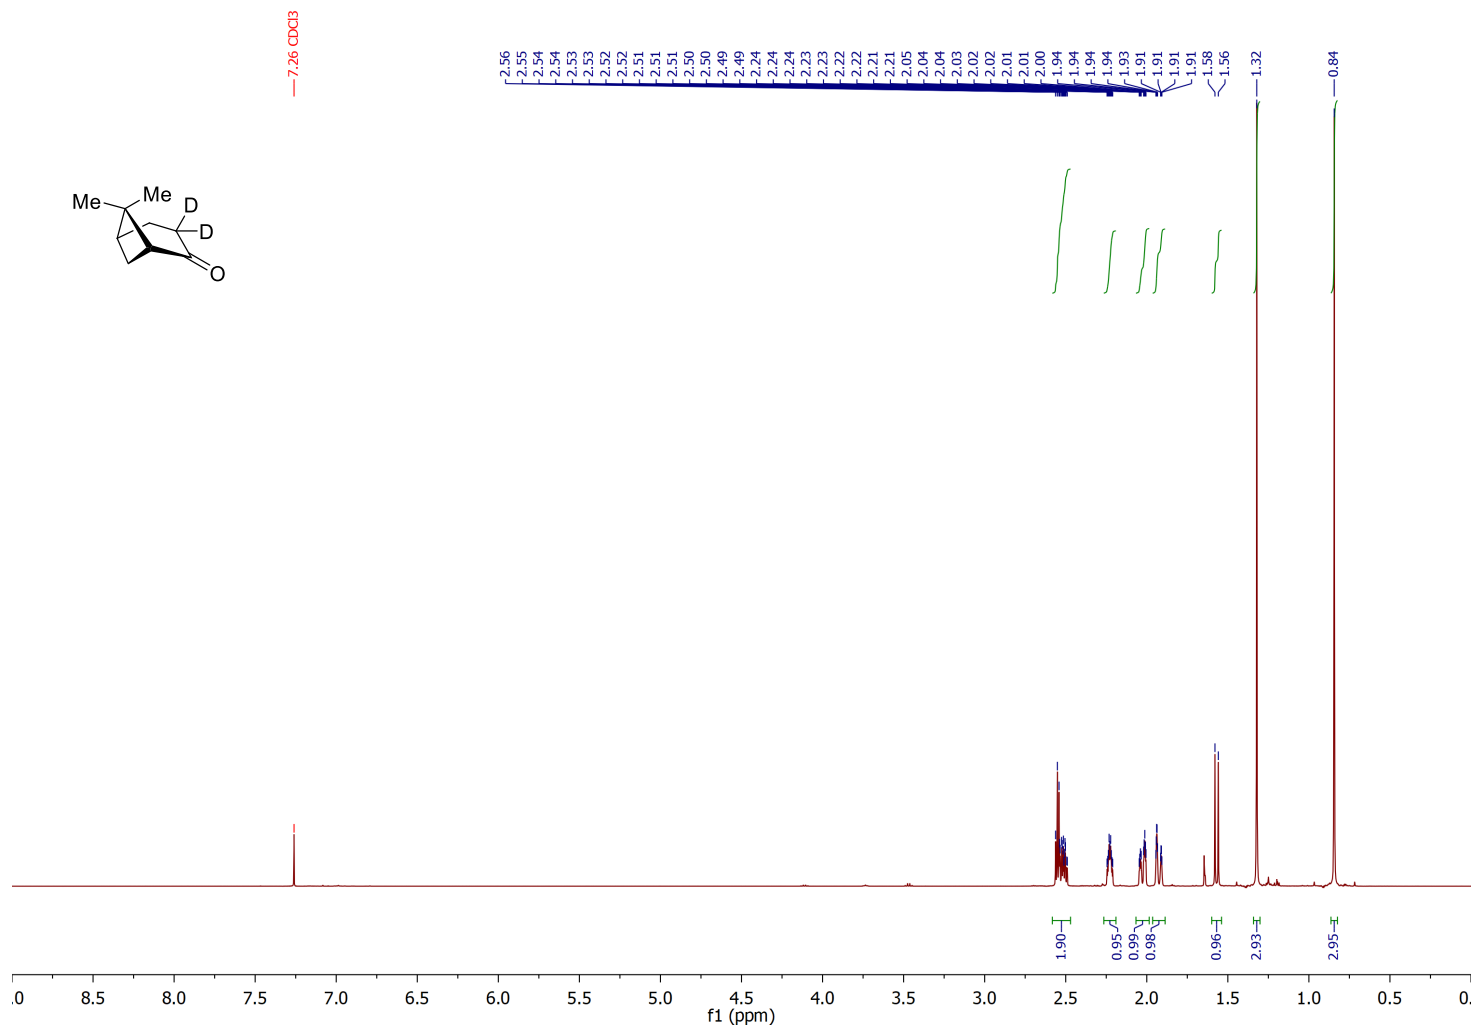

$^{13}\text{C}$  NMR (500 MHz,  $\text{CDCl}_3$ ) spectrum of (1*R*)-6,6-dimethylbicyclo[3.1.1]heptan-2-one-3,3- $d_2$ .

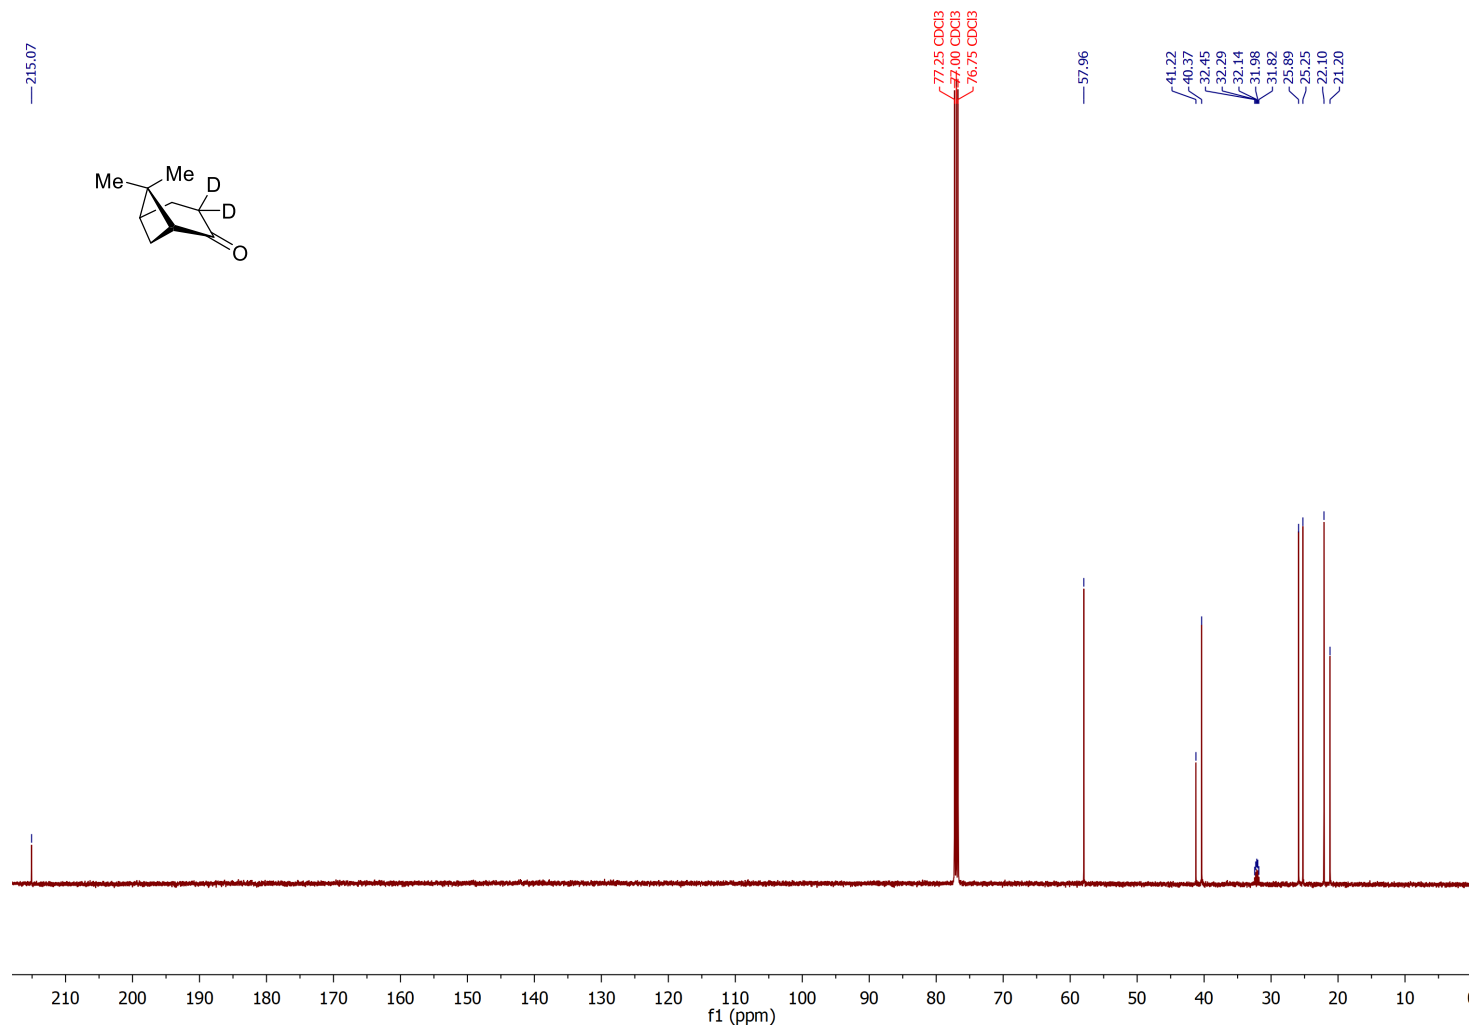

**<sup>1</sup>H NMR (500 MHz, CDCl<sub>3</sub>) spectrum of (1*R*)-6,6-dimethylbicyclo[3.1.1]hept-2-en-2-yl-3-*d* trifluoromethanesulfonate**

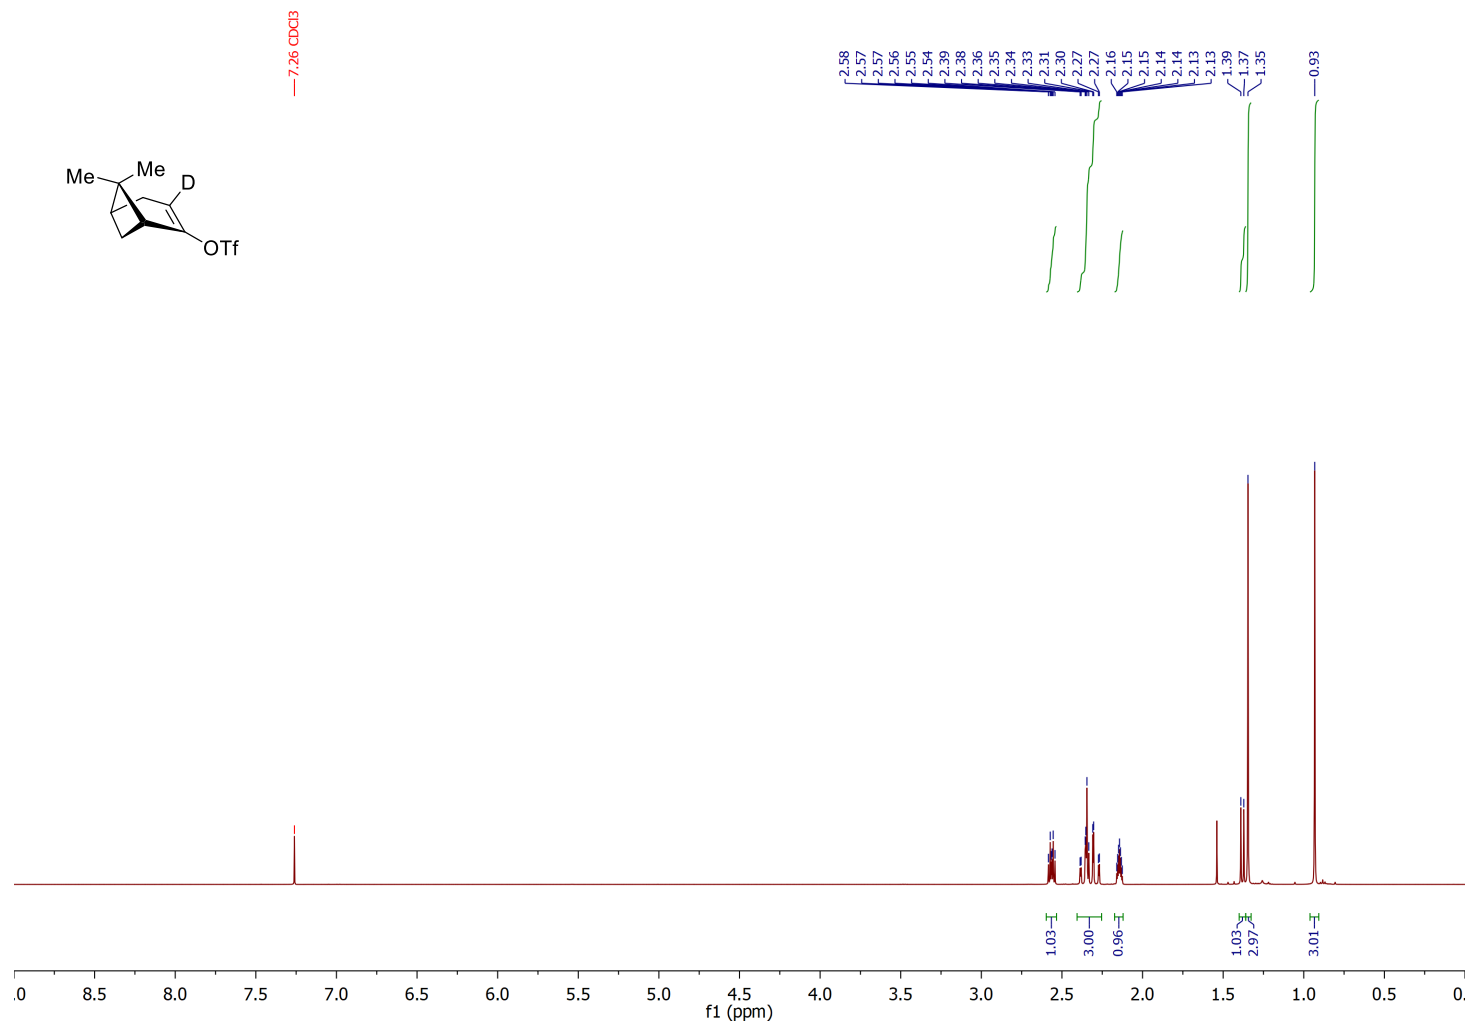

**$^{13}\text{C}$  NMR (500 MHz,  $\text{CDCl}_3$ ) spectrum of (1*R*)-6,6-dimethylbicyclo[3.1.1]hept-2-en-2-yl-3-*d* trifluoromethanesulfonate**

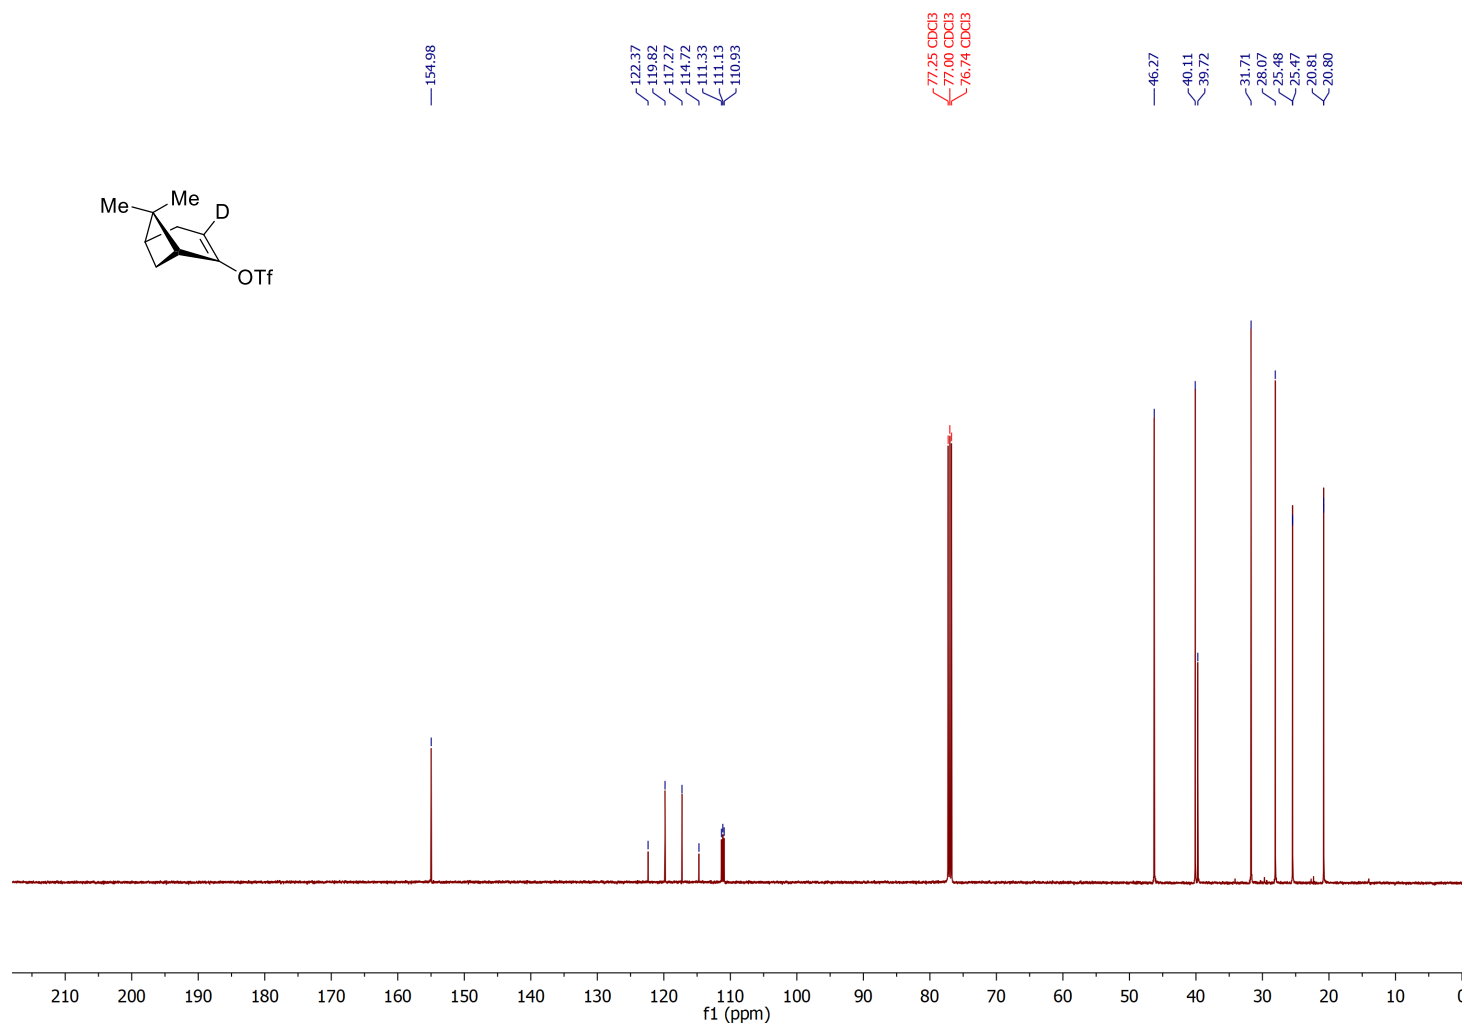



<sup>1</sup>H NMR (500 MHz, CDCl<sub>3</sub>) spectrum of (1*S*)-2,6,6-trimethylbicyclo[3.1.1]hept-2-ene-3-*d*.

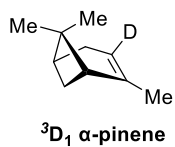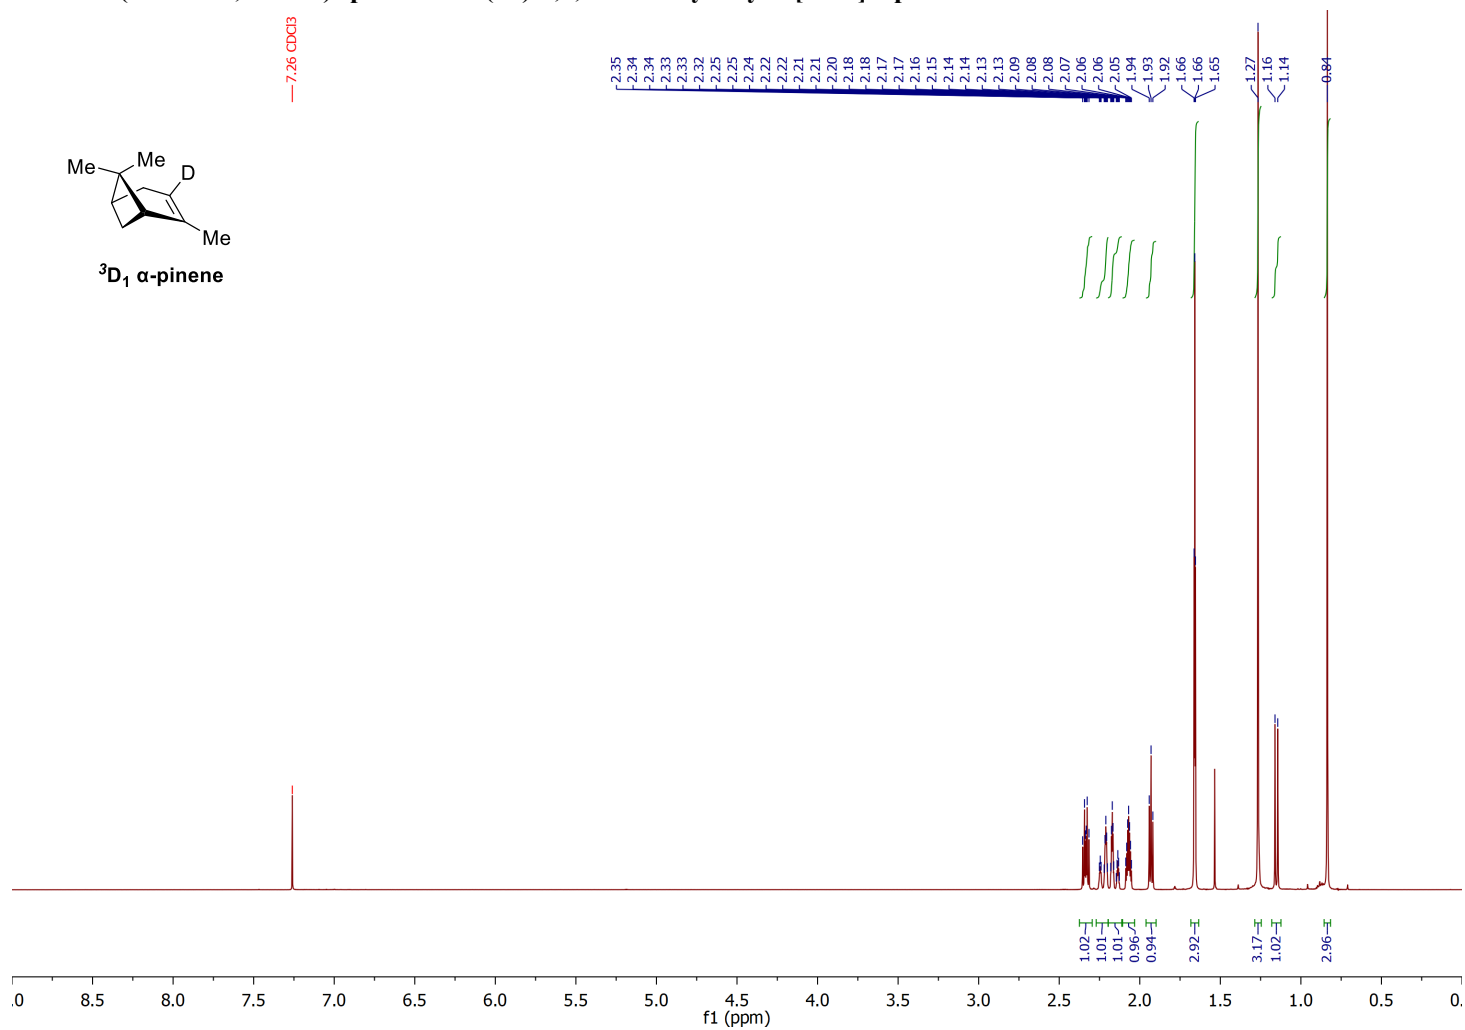

**$^{13}\text{C}$  NMR (500 MHz,  $\text{CDCl}_3$ ) spectrum of (1*S*)-2,6,6-trimethylbicyclo[3.1.1]hept-2-ene-3-*d*.**

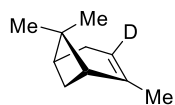

**$^3\text{D}_1$   $\alpha$ -pinene**

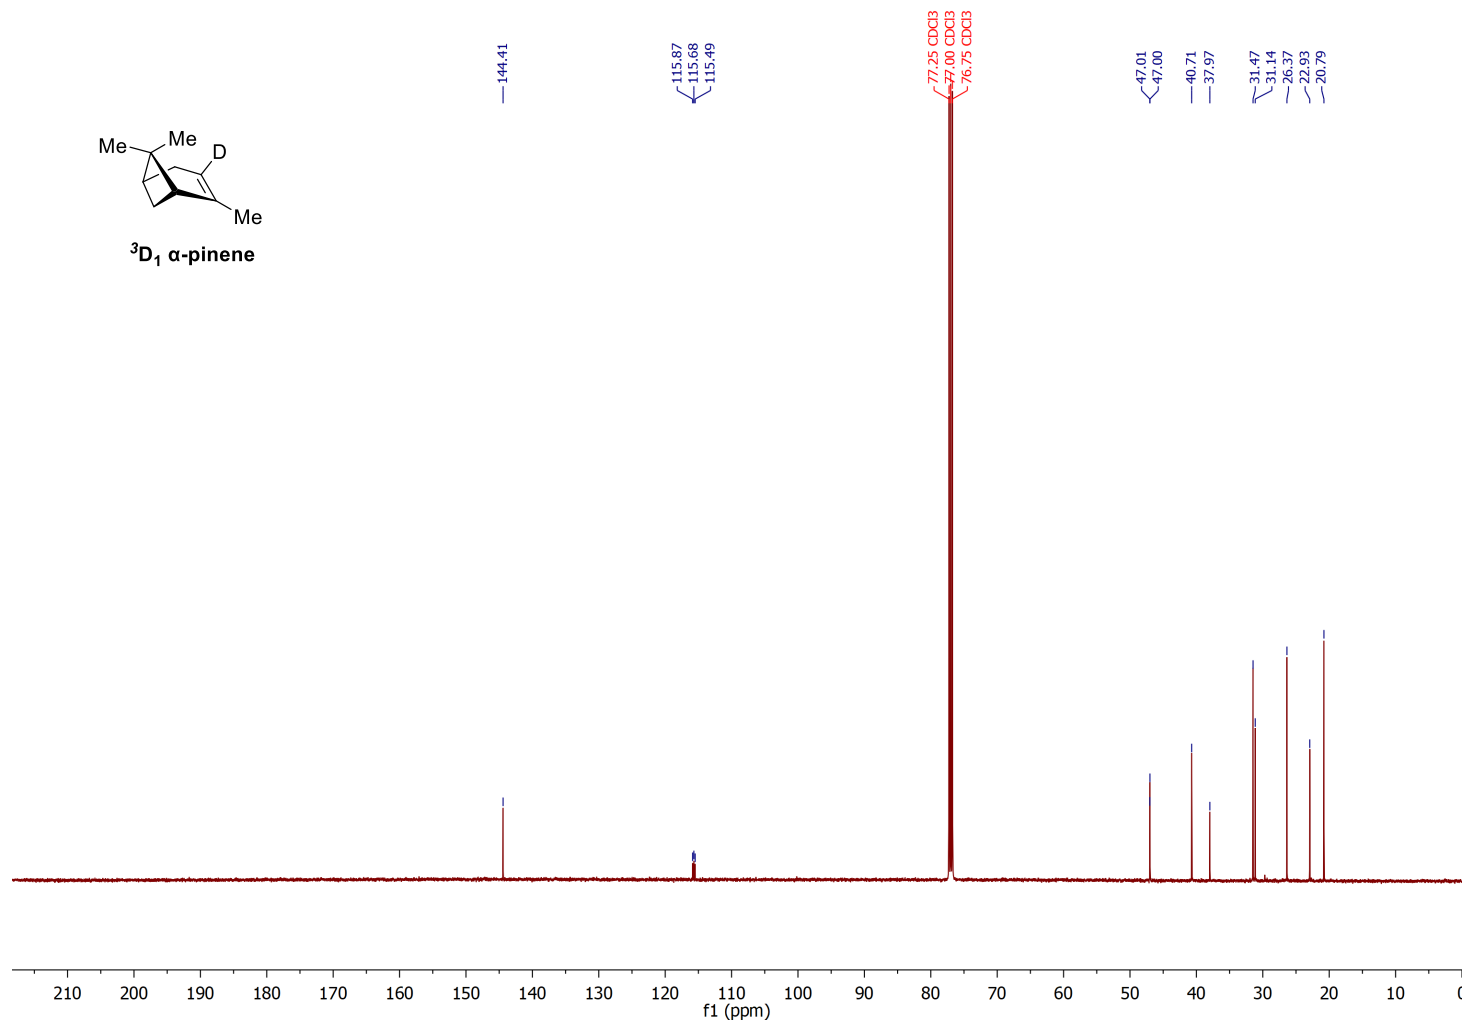

Supplement: Supplementary file 1 [file egusphere-2022-1131-supplement.pdf]
